# Supplementary material for: Distinct antibody responses to endemic coronaviruses pre- and post-SARS-CoV-2 infection in Kenyan infants and mothers
Source: PubMed Central journal article supplement — bioRxiv. 2022 Jun 3:2022.06.02.493651. Preprint. [Version 1] doi: 10.1101/2022.06.02.493651 (PMC9176650; doi:10.1101/2022.06.02.493651), 2022-06-03
Supplement: NIHPP2022.06.02.493651V1-supplement-1.pdf [file NIHPP2022.06.02.493651V1-supplement-1.pdf]

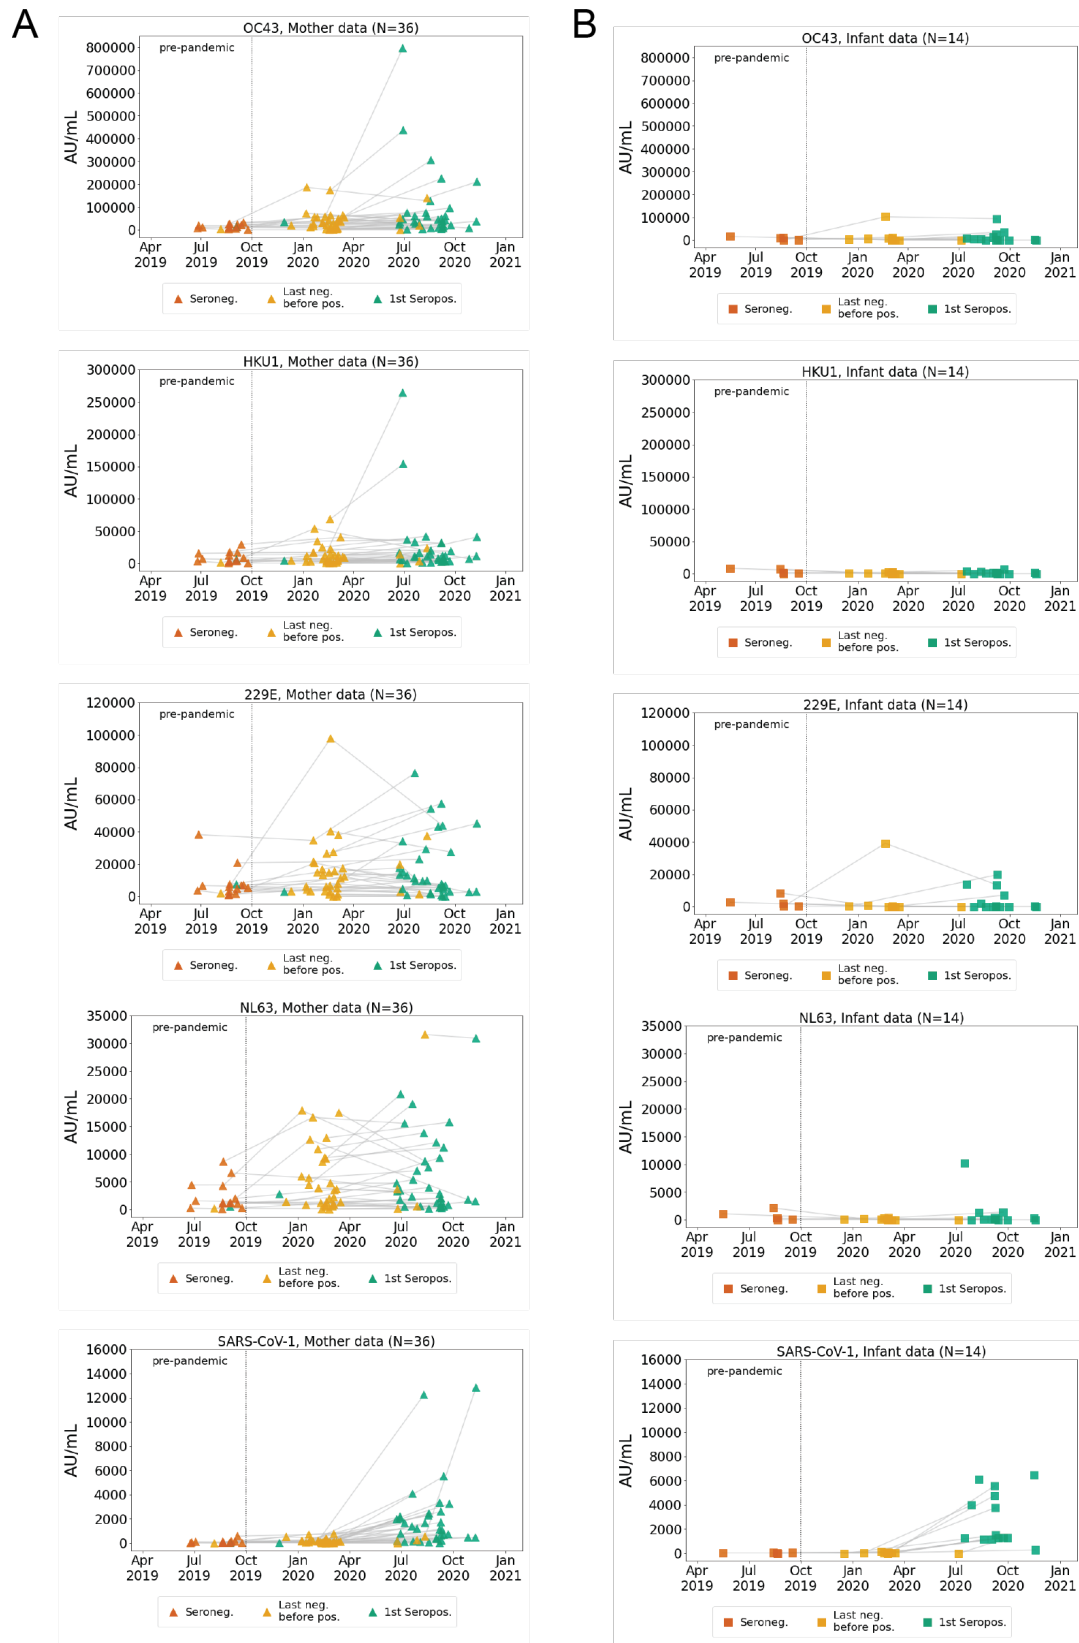

Figure S1. Longitudinal antibody binding responses to eHCoVs and SARS-CoV-1 in individuals that eventually seroconverted to SARS-CoV-2. IgG titers (AU/mL) over time for indicated HCoVs; left panels, eventually SARS-CoV-2 seroconverting mothers (N = 36); right panels, eventually SARS-CoV-2 seroconverting infants (N = 14).

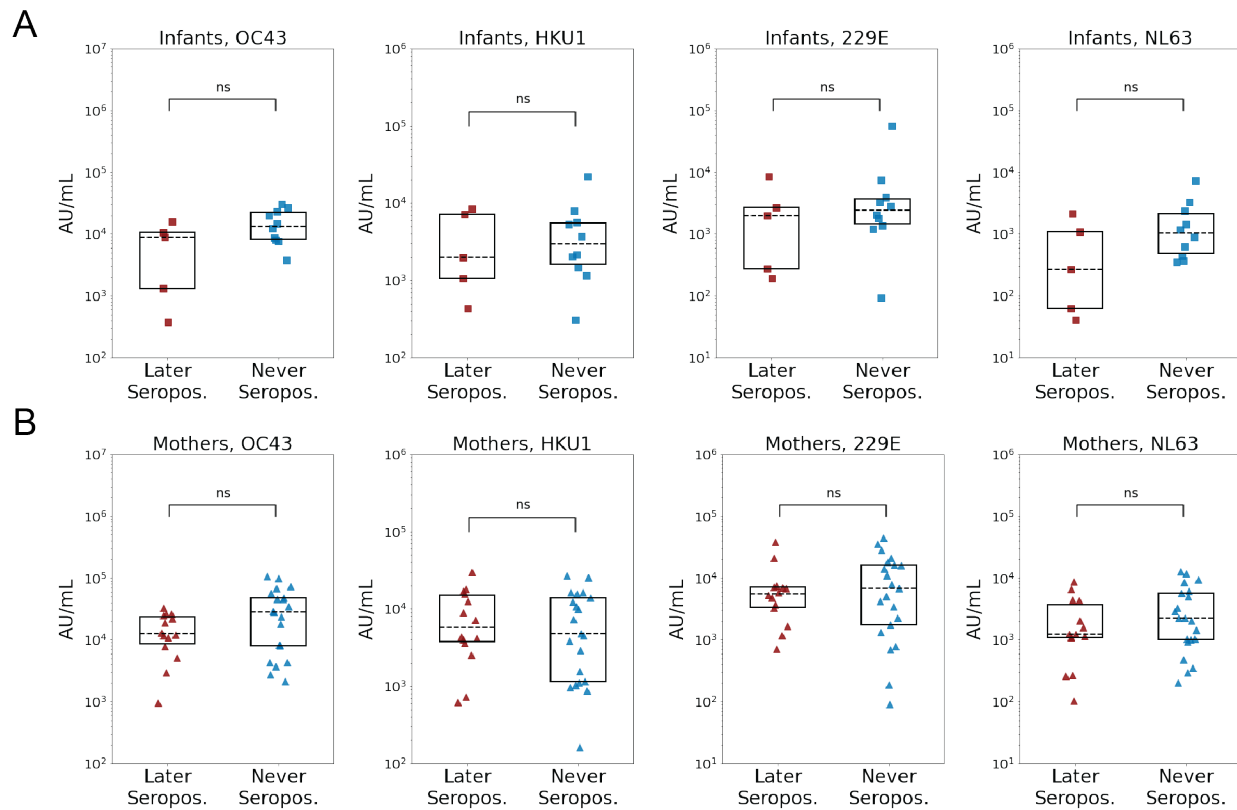

Figure S2. **Relationship between pre-pandemic eHCoV antibody titer and SARS-CoV-2 serostatus in infants and mothers.** (A) eHCoV antibody titers in infants that later became seropositive (N = 5) or were never seropositive (N = 10) for SARS-CoV-2. (B) eHCoV antibody titers in mothers that later became seropositive (N = 14) or were never seropositive (N = 21) for SARS-CoV-2. P values (A and B) were calculated using Wilcoxon rank-sum test with Bonferroni correction for multiple hypothesis testing. (ns)  $P > 0.05$ , (\*)  $P \leq 0.05$ , (\*\*)  $P \leq 0.01$ , (\*\*\*)  $P \leq 0.001$ , (\*\*\*\*)  $P \leq 0.0001$ .
